# Supplementary material
Source: Springer Nature journal article supplement (https://www.springermedizin.de/resource/supplementary/12885_2008_1400_MOESM4_ESM.pdf/9473032)

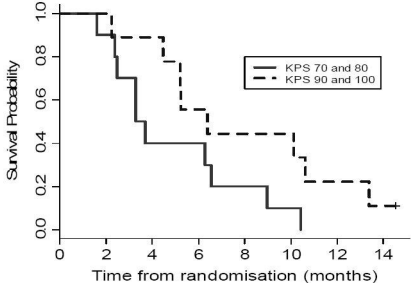

| Numbers at risk<br>(months) | 0  | 3 | 6 | 9 | 12 | median (95%CI) |
|-----------------------------|----|---|---|---|----|----------------|
| KPS<br>70/80                | 10 | 7 | 4 | 1 | 0  | 3.5 (2.5-6.5)  |
| KPS<br>90/100               | 9  | 8 | 5 | 4 | 2  | 6.4 (5.2-10.6) |

Supplement: MOESM4 [file 9473032]
